# Supplementary material for: N-Glycosylation Alteration of Serum and Salivary Immunoglobulin A Is a Possible Biomarker in Oral Mucositis
Source: PubMed Central journal article supplement (PMC7355945; doi:10.3390/jcm9061747), 2020-06-05
Supplement: jcm-09-01747-s001.pdf [file jcm-09-01747-s001.pdf]

# N-glycosylation alteration of serum and salivary immunoglobulin A is a possible biomarker in oral mucositis

Enikő Gebri <sup>1,†</sup>, Zsuzsanna Kovács <sup>2,3,†</sup>, Brigitta Mészáros <sup>2,3</sup>, Ferenc Tóth <sup>4</sup>, Ádám Simon <sup>2</sup>, Hajnalka Jankovics <sup>3</sup>, Ferenc Vonderviszt <sup>3</sup>, Attila Kiss <sup>5</sup>, András Guttman <sup>2,3,†</sup> and Tibor Hortobágyi <sup>6,7,8,\*</sup>

**Table S1.** The key demographic and clinical data of the participants.

| Average age (years)       | Conditioning regimen                                |
|---------------------------|-----------------------------------------------------|
| Controls<br>41.9±18.35    | BEAM<br>5                                           |
| Patients<br>49.5±14.19    | Melphalan (high dose, ≥200 mg/m <sup>2</sup> )<br>3 |
| Gender                    | Pretreatment time (months)                          |
| Controls<br>9F, 1M        | Hodgkin lymphoma<br>10.5±0.7                        |
| Patients<br>5F, 3M        | Non-Hodgkin lymphoma<br>9±4.6                       |
|                           | Multiple myeloma<br>10±7                            |
| Diagnosis                 | Pretransplantational stage of the disease           |
| Hodgkin lymphoma<br>2     | Complete remission<br>5                             |
| Non-Hodgkin lymphoma<br>3 | Very good partial remission<br>1                    |
| Multiple myeloma<br>3     | Partial remission<br>2                              |

BEAM (BCNU, etoposide, cytosine arabinoside, melphalan); F (female); M (male).

**Table S2.** Mean and standard errors of the PeakArea% of the significantly changed IgA N-glycan structures in the serum.

| Glycan     | Experimental group       |                           |                          |                          |                          | p value |
|------------|--------------------------|---------------------------|--------------------------|--------------------------|--------------------------|---------|
|            | control<br>(n = 10)      | day -3/-7<br>(n = 8)      | day 0<br>(n = 8)         | day +7<br>(n = 8)        | day +14<br>(n = 7)       |         |
| FA2BG2S2   | 6.13±3.75 <sup>a</sup>   | 12.1±3.23 <sup>b</sup>    | 11.5±2.45 <sup>b</sup>   | 9.12±2.59 <sup>ab</sup>  | 7.25±2.7 <sup>b</sup>    | 0.0006  |
| FA3G3[3]S3 | 2.67±2.7 <sup>a</sup>    | 15.1±5.67 <sup>b</sup>    | 15.6±6.65 <sup>b</sup>   | 13.1±4.49 <sup>b</sup>   | 12.9±5.07 <sup>b</sup>   | <0.0001 |
| A1[3]      | 1.92±3.41 <sup>a</sup>   | 3.39±1.42 <sup>ab</sup>   | 3.61±1.45 <sup>ab</sup>  | 4.62±1.8 <sup>b</sup>    | 3.4±2.69 <sup>ab</sup>   | 0.0142  |
| A2BG2S1    | 11.6±5.03 <sup>a</sup>   | 1.46±0.32 <sup>b</sup>    | 1.38±0.239 <sup>b</sup>  | 1.04±0.44 <sup>b</sup>   | 1.19±0.551 <sup>b</sup>  | 0.0010  |
| A2         | 1.01±0.734 <sup>a</sup>  | 9.86±3.71 <sup>b</sup>    | 11.3±2.64 <sup>b</sup>   | 12.3±1.7 <sup>b</sup>    | 7.25±5.99 <sup>ab</sup>  | 0.0002  |
| A2B        | 2.08±1.59 <sup>a</sup>   | 9.11±2.94 <sup>b</sup>    | 8.53±2.95 <sup>b</sup>   | 7.12±2.32 <sup>b</sup>   | 10.3±3.73 <sup>b</sup>   | 0.0001  |
| FA2        | 0.475±0.277 <sup>a</sup> | 3.8±1.76 <sup>b</sup>     | 2.97±1.59 <sup>b</sup>   | 4.46±1.88 <sup>b</sup>   | 2.75±1.9 <sup>b</sup>    | <0.0001 |
| M7b        | 1.98±0.734 <sup>a</sup>  | 0.598±0.153 <sup>ab</sup> | 0.354±0.178 <sup>b</sup> | 0.654±0.7 <sup>b</sup>   | 1.17±0.937 <sup>ab</sup> | 0.0002  |
| A4         | 5.97±2.79 <sup>a</sup>   | 2.63±0.638 <sup>ab</sup>  | 1.94±0.751 <sup>b</sup>  | 2.37±1.34 <sup>ab</sup>  | 1.47±1.14 <sup>b</sup>   | <0.0001 |
| FA2[3]G1   | 3.28±1.72 <sup>a</sup>   | 0.503±0.184 <sup>b</sup>  | 0.525±0.245 <sup>b</sup> | 0.496±0.151 <sup>b</sup> | 0.46±0.273 <sup>b</sup>  | <0.0001 |

|        |                         |                          |                          |                           |                          |         |
|--------|-------------------------|--------------------------|--------------------------|---------------------------|--------------------------|---------|
| A2G2   | 3.92±0.922 <sup>a</sup> | 0.646±0.384 <sup>b</sup> | 0.748±0.492 <sup>b</sup> | 0.678±0.28 <sup>b</sup>   | 1.37±0.761 <sup>ab</sup> | <0.0001 |
| A2BG2  | 1.26±0.437 <sup>a</sup> | 0.774±0.3 <sup>ab</sup>  | 0.574±0.341 <sup>b</sup> | 0.705±0.386 <sup>ab</sup> | 0.671±0.36 <sup>ab</sup> | 0.0239  |
| FA2G2  | 10.7±4.59 <sup>a</sup>  | 2.06±1.04 <sup>ab</sup>  | 1.45±0.86 <sup>b</sup>   | 1.78±0.752 <sup>b</sup>   | 1.82±0.83 <sup>b</sup>   | <0.0001 |
| FA2BG2 | 1.79±0.522 <sup>a</sup> | 0.306±0.434 <sup>b</sup> | 0.404±0.684 <sup>b</sup> | 0.153±0.074 <sup>b</sup>  | 0.259±0.273 <sup>b</sup> | <0.0001 |

Values are mean PeakAreas%±SD. Superscript 'a' indicates baseline control level; 'b' indicates significant difference (p<0.05), 'ab' indicates no significant difference, analyzed with one-way analysis of variance (ANOVA).

**Table S3.** Comparison of various IgA N-glycan structures in serum in different groups and time points with Tukey's multiple comparisons statistical test. p<0.05 is considered significant difference.

| Comparison            |       | FA2BG2S2 | FA3G3[3]S3 | A1[3]   | A2BG2S1 | A2      |
|-----------------------|-------|----------|------------|---------|---------|---------|
| control vs. day -3/-7 | -3/-7 | 0.0016   | <0.0001    | 0.6844  | <0.0001 | 0.0464  |
| control vs. day 0     |       | 0.0058   | <0.0001    | 0.5642  | <0.0001 | 0.0069  |
| control vs. day +7    |       | 0.2518   | 0.0008     | 0.01354 | <0.0001 | 0.0002  |
| control vs. day +14   |       | 0.9424   | 0.0017     | 0.708   | <0.0001 | 0.2887  |
| day -3/-7 vs. day 0   |       | 0.9919   | 0.9997     | 0.9997  | >0.9999 | >0.9999 |
| day -3/-7 vs. day +7  |       | 0.2894   | 0.9314     | 0.8346  | 0.9974  | >0.9999 |
| day -3/-7 vs. day +14 |       | 0.0279   | 0.9047     | >0.9999 | 0.9996  | >0.9999 |
| day 0 vs. day +7      |       | 0.5354   | 0.8589     | 0.9104  | 0.9989  | >0.9999 |
| day 0 vs. day +14     |       | 0.0755   | 0.8238     | 0.9998  | >0.9999 | >0.9999 |
| day +7 vs. day +14    |       | 0.7583   | >0.9999    | 0.8552  | >0.9999 | 0.594   |

| Comparison            |       | A2B     | FA2     | M7b     | A4      | FA2[3]G1 |
|-----------------------|-------|---------|---------|---------|---------|----------|
| control vs. day -3/-7 | -3/-7 | <0.0001 | 0.0006  | 0.1235  | 0.4163  | 0.0099   |
| control vs. day 0     |       | 0.0001  | 0.0137  | 0.0001  | 0.0158  | 0.0111   |
| control vs. day +7    |       | 0.0034  | <0.0001 | 0.0125  | 0.0699  | 0.0135   |
| control vs. day +14   |       | <0.0001 | 0.0382  | 0.8881  | 0.0024  | 0.0038   |
| day -3/-7 vs. day 0   |       | 0.9928  | 0.8194  | 0.7773  | >0.9999 | >0.9999  |
| day -3/-7 vs. day +7  |       | 0.5898  | 0.9109  | >0.9999 | >0.9999 | >0.9999  |
| day -3/-7 vs. day +14 |       | 0.906   | 0.6907  | >0.9999 | >0.9999 | >0.9999  |
| day 0 vs. day +7      |       | 0.8348  | 0.3215  | >0.9999 | >0.9999 | >0.9999  |
| day 0 vs. day +14     |       | 0.7037  | 0.9988  | 0.1746  | >0.9999 | >0.9999  |
| day +7 vs. day +14    |       | 0.1725  | 0.2297  | >0.9999 | >0.9999 | >0.9999  |

| Comparison            |       | A2G2    | A2BG2   | FA2G2   | FA2BG2  |
|-----------------------|-------|---------|---------|---------|---------|
| control vs. day -3/-7 | -3/-7 | 0.0004  | 0.4809  | 0.0513  | 0.0062  |
| control vs. day 0     |       | 0.0007  | 0.0301  | 0.0012  | 0.0012  |
| control vs. day +7    |       | 0.0011  | 0.1386  | 0.0176  | 0.0096  |
| control vs. day +14   |       | 0.3979  | 0.1742  | 0.0233  | 0.0216  |
| day -3/-7 vs. day 0   |       | >0.9999 | >0.9999 | >0.9999 | >0.9999 |
| day -3/-7 vs. day +7  |       | >0.9999 | >0.9999 | >0.9999 | >0.9999 |
| day -3/-7 vs. day +14 |       | 0.6738  | >0.9999 | >0.9999 | >0.9999 |
| day 0 vs. day +7      |       | >0.9999 | >0.9999 | >0.9999 | >0.9999 |
| day 0 vs. day +14     |       | 0.9141  | >0.9999 | >0.9999 | >0.9999 |
| day +7 vs. day +14    |       | >0.9999 | >0.9999 | >0.9999 | >0.9999 |

**Table S4.** Comparison of various IgA N-glycan structures in saliva in different groups and time points with Tukey's multiple comparisons statistical test.  $p < 0.05$  is considered significant difference.

| Comparison            | FA2     | M7a     | FA2B    | A2G2    | Unknown |
|-----------------------|---------|---------|---------|---------|---------|
| control vs. day -3/-7 | 0.0377  | 0.1754  | 0.1419  | 0.0836  | 0.017   |
| control vs. day 0     | 0.1232  | 0.0613  | 0.0523  | 0.1095  | >0.9999 |
| control vs. day +7    | 0.0165  | 0.2695  | 0.0109  | 0.2522  | >0.9999 |
| control vs. day +14   | 0.0054  | 0.0428  | 0.0109  | 0.0096  | >0.9999 |
| day -3/-7 vs. day 0   | 0.9993  | 0.9773  | >0.9999 | >0.9999 | >0.9999 |
| day -3/-7 vs. day +7  | 0.9723  | >0.9999 | >0.9999 | 0.985   | 0.5102  |
| day -3/-7 vs. day +14 | 0.9476  | 0.9473  | >0.9999 | 0.9587  | >0.9999 |
| day 0 vs. day +7      | 0.9346  | 0.974   | >0.9999 | 0.9818  | >0.9999 |
| day 0 vs. day +14     | 0.8952  | 0.9999  | >0.9999 | 0.9769  | >0.9999 |
| day +7 vs. day +14    | >0.9999 | 0.9446  | >0.9999 | 0.7404  | >0.9999 |

| Comparison            | Unknown |
|-----------------------|---------|
| control vs. day -3/-7 | 0.0939  |
| control vs. day 0     | 0.0336  |
| control vs. day +7    | 0.6541  |
| control vs. day +14   | 0.0747  |
| day -3/-7 vs. day 0   | 0.9721  |
| day -3/-7 vs. day +7  | 0.7224  |
| day -3/-7 vs. day +14 | 0.9987  |
| day 0 vs. day +7      | 0.3935  |
| day 0 vs. day +14     | 0.9976  |
| day +7 vs. day +14    | 0.5993  |

**Table S5.** Mean and standard errors of the PeakArea% of the significantly changed IgA N-glycan structures in the saliva.

| Glycan  | Experimental group     |                         |                          |                         |                          | p value |
|---------|------------------------|-------------------------|--------------------------|-------------------------|--------------------------|---------|
|         | control<br>(n = 10)    | day -3/-7<br>(n = 8)    | day 0<br>(n = 7)         | day +7<br>(n = 7)       | day +14<br>(n = 7)       |         |
| FA2     | 4.33±2.84 <sup>a</sup> | 1.72±0.69 <sup>b</sup>  | 1.96±1.3 <sup>ab</sup>   | 1.1±0.334 <sup>b</sup>  | 1.04±0.918 <sup>b</sup>  | 0.0030  |
| M7a     | 6.2±4.41 <sup>a</sup>  | 3.34±2.01 <sup>ab</sup> | 2.57±1.12 <sup>ab</sup>  | 3.43±1.48 <sup>ab</sup> | 2.37±1.21 <sup>b</sup>   | 0.0334  |
| FA2B    | 15.5±5.55 <sup>a</sup> | 6.31±6.42 <sup>ab</sup> | 3.87±2.46 <sup>ab</sup>  | 3.79±2.59 <sup>b</sup>  | 3.3±1.97 <sup>b</sup>    | <0.0001 |
| A2G2    | 15.7±10.2 <sup>a</sup> | 5.15±4.39 <sup>ab</sup> | 4.88±4.52 <sup>ab</sup>  | 7.49±7.01 <sup>ab</sup> | 2.19±1.09 <sup>b</sup>   | 0.0092  |
| Unknown | 4.82±2.06 <sup>a</sup> | 1.23±0.577 <sup>b</sup> | 3.41±2.58 <sup>ab</sup>  | 6.92±9.29 <sup>ab</sup> | 3.34±1.93 <sup>ab</sup>  | 0.0408  |
| Unknown | 4.65±1.84 <sup>a</sup> | 1.72±1.08 <sup>ab</sup> | 0.905±0.576 <sup>b</sup> | 3.22±3.37 <sup>ab</sup> | 1.36±0.673 <sup>ab</sup> | 0.0157  |

Values are mean PeakAreas%±SD. Superscript 'a' indicate baseline control level; 'b' indicates significant difference ( $p < 0.05$ ), 'ab' indicates no significant difference, analyzed with one-way analysis of variance (ANOVA).

**Table S6.** The sialoform to neutral (SF/NF) carbohydrate ratio of saliva and serum total IgA-associated glycans (upper half) and of the overlapping (i.e. present both in serum and saliva) glycan structures (lower half).

| <b>Saliva samples</b>         |                |                  |              |               |                |
|-------------------------------|----------------|------------------|--------------|---------------|----------------|
| <b>Group</b>                  | <b>control</b> | <b>day -3/-7</b> | <b>day 0</b> | <b>day +7</b> | <b>day +14</b> |
| SF/NF ratio                   | 0.38           | 0.74             | 0.70         | 0.57          | 0.64           |
| mean%/%                       | 27.63/72.37    | 42.54/57.46      | 41.12/58.88  | 36.16/63.84   | 39.12/60.88    |
| <b>Serum samples</b>          |                |                  |              |               |                |
| SF/NF ratio                   | 2.24           | 5.68             | 7.12         | 5.56          | 3.96           |
| mean%/%                       | 69.12/30.88    | 85.03/14.97      | 87.68/12.32  | 84.75/15.25   | 79.82/20.18    |
| <b>Overlapping structures</b> |                |                  |              |               |                |
| <b>Saliva samples</b>         |                |                  |              |               |                |
| <b>Group</b>                  | <b>control</b> | <b>day -3/-7</b> | <b>day 0</b> | <b>day +7</b> | <b>day +14</b> |
| SF/NF ratio                   | 0.61           | 0.59             | 0.79         | 0.72          | 0.80           |
| mean%/%                       | 38.03/61.97    | 37.11/62.89      | 44.01/55.99  | 41.93/58.07   | 44.57/55.43    |
| <b>Serum samples</b>          |                |                  |              |               |                |
| SF/NF ratio                   | 2.15           | 11.27            | 13.85        | 12.27         | 5.30           |
| mean%/%                       | 68.25/31.75    | 91.85/8.15       | 93.26/6.74   | 92.46/7.54    | 84.13/15.87    |
